# Supplementary material for: The Effect of Foliar Application of K2SO4 or KH2PO4 on Skin Color of the ‘Kyoho’ Grape
Source: MDPI journal article supplement (doi:10.3390/agronomy11112361), 2021-11-22
Supplement: s1 [file s1]

**Table S1.** Candidate structural genes related to flavonoid biosynthesis at 90 DAFB.

| Gene ID           | FPKM    |         |        | Description                                                 | Annotation |
|-------------------|---------|---------|--------|-------------------------------------------------------------|------------|
|                   | CK      | T1      | T2     |                                                             |            |
| VIT_16s0039g01130 | 0.13    | 0.05    | 0.57   | phenylalanine ammonia-lyase                                 | PAL        |
| VIT_11s0065g00350 | 0.35    | 0.23    | 6.17   | cytochrome P450 CYP73A100                                   | CYP73A     |
| VIT_16s0039g02040 | 16.09   | 13.77   | 28.50  | 4-coumarate:CoA ligase                                      | 4CL        |
| VIT_18s0001g14310 | 324.19  | 278.52  | 529.70 | flavanone 3-dioxygenase-like                                | F3H        |
| VIT_06s0009g02970 | 0.47    | 2.15    | 1.92   | flavonoid 3'5' hydroxylase                                  | F3'5'H     |
| VIT_06s0061g01430 | 6.05    | 7.96    | 11.62  | flavanone 7-O-glucoside<br>2"-O-beta-L-rhamnosyltransferase |            |
| VIT_07s0031g00350 | 794.02  | 492.30  | 294.25 | caffeoyl-CoA O-methyltransferase                            |            |
| VIT_08s0040g00780 | 16.60   | 4.96    | 4.16   | cytochrome P450 98A2                                        | CYP98A     |
| VIT_11s0037g00440 | 1.09    | 0.18    | 1.66   | shikimate O-hydroxycinnamoyltransferase                     |            |
| VIT_11s0065g00350 | 20.84   | 13      | 44.5   | chalcone synthase                                           | CHS        |
| VIT_16s0022g01020 | 0.51    | 1.53    | 6.58   | stilbene synthase 3                                         | CHS        |
| VIT_16s0022g01140 | 0       | 0.18    | 0.35   | chalcone synthase                                           | CHS        |
| VIT_16s0022g01190 | 0.26    | 0.23    | 1.63   | chalcone synthase                                           | CHS        |
| VIT_16s0100g00750 | 0.45    | 0.22    | 5.74   | stilbene synthase 2                                         | CHS        |
| VIT_16s0100g00770 | 0.18    | 0.04    | 1.1    | stilbene synthase 5                                         | CHS        |
| VIT_16s0100g00830 | 0.10    | 0.06    | 1.61   | stilbene synthase 5-like                                    | CHS        |
| VIT_16s0100g00840 | 0       | 0.02    | 0.27   | stilbene synthase 4-like                                    | CHS        |
| VIT_16s0100g00850 | 0       | 0.02    | 0.21   | stilbene synthase 4-like                                    | CHS        |
| VIT_16s0100g00910 | 0.24    | 0.18    | 2.58   | stilbene synthase 5                                         | CHS        |
| VIT_16s0100g00930 | 0       | 0.03    | 0.28   | stilbene synthase 4-like                                    | CHS        |
| VIT_16s0100g01000 | 0       | 0.05    | 1.33   | stilbene synthase 4-like                                    | CHS        |
| VIT_16s0100g01010 | 0.09    | 0.17    | 1.74   | stilbene synthase 2                                         | CHS        |
| VIT_16s0100g01020 | 0.05    | 0.05    | 1.35   | stilbene synthase 4-like                                    | CHS        |
| VIT_16s0100g01040 | 0.04    | 0.04    | 0.78   | stilbene synthase 4                                         | CHS        |
| VIT_16s0100g01070 | 0.25    | 0.01    | 2.55   | stilbene synthase 1                                         | CHS        |
| VIT_16s0100g01100 | 0.03    | 0.01    | 0.53   | stilbene synthase 6-like                                    | CHS        |
| VIT_16s0100g01110 | 0.05    | 0       | 0.07   | stilbene synthase 1-like                                    | CHS        |
| VIT_16s0100g01120 | 0.05    | 0.08    | 0.75   | stilbene synthase 5                                         | CHS        |
| VIT_16s0100g01140 | 0.01    | 0.03    | 0.49   | stilbene synthase 1                                         | CHS        |
| VIT_16s0100g01150 | 0.18    | 0.29    | 4.98   | stilbene synthase 6                                         | CHS        |
| VIT_16s0100g01190 | 0.01    | 0.08    | 0.73   | resveratrol synthase                                        | CHS        |
| VIT_18s0001g03430 | 0.68    | 0.81    | 3.63   | flavonol synthase/flavanone 3-hydroxylase                   | FLS        |
| VIT_18s0001g03470 | 1.66    | 0.24    | 10.74  | flavonol synthase/flavanone 3-hydroxylase                   | FLS        |
| VIT_02s0025g04720 | 1329.98 | 1352.67 | 539.08 | leucoanthocyanidin dioxygenase                              | ANS        |
| VIT_18s0041g00740 | 12.43   | 11.31   | 25.65  | anthocyanidin<br>5,3-O-glucosyltransferase-like             | UFGT       |

**Table S2.** Candidate structural genes related to flavonoid biosynthesis at 110 DAFB.

| Gene ID           | FPKM   |        |         | Description                                  | Annotation |
|-------------------|--------|--------|---------|----------------------------------------------|------------|
|                   | CK     | T1     | T2      |                                              |            |
| VIT_16s0039g01130 | 1.32   | 0.11   | 0.05    | phenylalanine ammonia-lyase                  | PAL        |
| VIT_11s0065g00350 | 7.01   | 2.32   | 0.33    | cytochrome P450 CYP73A100                    | CYP73A     |
| VIT_11s0065g00350 | 7.00   | 2.32   | 0.33    | 4-coumarate:CoA ligase                       | 4CL        |
| VIT_18s0001g14310 | 407.29 | 471.37 | 372.95  | flavanone 3-dioxygenase-like                 | F3H        |
| VIT_06s0009g02970 | 2.14   | 1.52   | 1.73    | flavonoid 3'5' hydroxylase                   | F3'5'H     |
| VIT_07s0031g00350 | 147.99 | 190.1  | 879.26  | caffeoyl-CoA O-methyltransferase             |            |
| VIT_08s0040g00780 | 0.41   | 0.71   | 13.46   | cytochrome P450 98A2                         | CYP98A     |
| VIT_09s0018g01190 | 8.03   | 7.29   | 25.37   | shikimate O-hydroxycinnamoyltransferase      |            |
| VIT_10s0042g00920 | 0.31   | 0.02   | 0       | stilbene synthase 2                          | CHS2       |
| VIT_11s0037g00570 | 0.41   | 1.03   | 1.07    | spermidine hydroxycinnamoyl transferase-like |            |
| VIT_14s0068g00930 | 17.8   | 44.78  | 23.98   | chalcone synthase                            | CHS        |
| VIT_16s0022g01020 | 7.90   | 7.76   | 1.31    | stilbene synthase 3                          | CHS        |
| VIT_16s0022g01140 | 0.74   | 0.40   | 0.04    | chalcone synthase                            | CHS        |
| VIT_16s0022g01190 | 0.84   | 1.87   | 0.09    | chalcone synthase                            | CHS        |
| VIT_16s0100g00750 | 11.40  | 1.69   | 0.46    | stilbene synthase 2                          | CHS        |
| VIT_16s0100g00770 | 2.22   | 0.46   | 0.04    | stilbene synthase 5                          | CHS        |
| VIT_16s0100g00830 | 4.47   | 0.34   | 0.10    | stilbene synthase 5-like                     | CHS        |
| VIT_16s0100g00840 | 0.42   | 0      | 0       | stilbene synthase 4-like                     | CHS        |
| VIT_16s0100g00880 | 1.08   | 0.05   | 0.03    | stilbene synthase 4-like                     | CHS        |
| VIT_16s0100g00910 | 7.19   | 0.83   | 0.09    | stilbene synthase 5                          | CHS        |
| VIT_16s0100g00920 | 0.28   | 0.02   | 0       | stilbene synthase 4-like                     | CHS        |
| VIT_16s0100g01000 | 1.76   | 0.25   | 0.05    | stilbene synthase 4-like                     | CHS        |
| VIT_16s0100g01010 | 4.27   | 0.27   | 0.18    | stilbene synthase 2                          | CHS        |
| VIT_16s0100g01020 | 3.11   | 0.48   | 0.13    | stilbene synthase 4-like                     | CHS        |
| VIT_16s0100g01040 | 0.60   | 0.05   | 0       | stilbene synthase 4                          | CHS        |
| VIT_16s0100g01070 | 4.79   | 0.40   | 0.06    | stilbene synthase 1                          | CHS        |
| VIT_16s0100g01120 | 0.85   | 0.13   | 0       | stilbene synthase 5                          | CHS        |
| VIT_16s0100g01150 | 9.37   | 0.52   | 0.14    | stilbene synthase 6                          | CHS        |
| VIT_16s0100g01190 | 1.03   | 0.11   | 0       | resveratrol synthase                         | CHS        |
| VIT_18s0001g03430 | 7.24   | 2.16   | 0.26    | flavonol synthase/flavanone 3-hydroxylase    | FLS        |
| VIT_18s0001g03470 | 0.21   | 11.17  | 1.40    | flavonol synthase/flavanone 3-hydroxylase    | FLS        |
| VIT_02s0025g04720 | 538.00 | 617.95 | 1360.90 | leucoanthocyanidin dioxygenase               | ANS        |
| VIT_18s0041g00900 | 3.47   | 6.74   | 9.91    | UDP-glycosyltransferase 88F5-like            | P2'GT      |
